# Supplementary material for: Histone deacetylase 6 inhibition in urothelial cancer as a potential new strategy for cancer treatment
Source: PubMed Central journal article supplement — Oncol Lett. 2020 Nov 20;21(1):64. doi: 10.3892/ol.2020.12315 (PMC7709567; doi:10.3892/ol.2020.12315), 2020-11-20

Figure S1. Cultured urothelial cancer cell lines were treated with DMSO or indicated doses of HDAC6 small molecule inhibitors for 24, 48, 72 and 96 h. (A) Tubastatin A, nexturastat, HDACi A and HDACi C. (B) HDACi G, H, I and J. Relative cell viability was measured using an MTS assay and results are presented as OD 490 nm. OD, optical density; HDACi, histone deacetylase inhibitor.

**A**

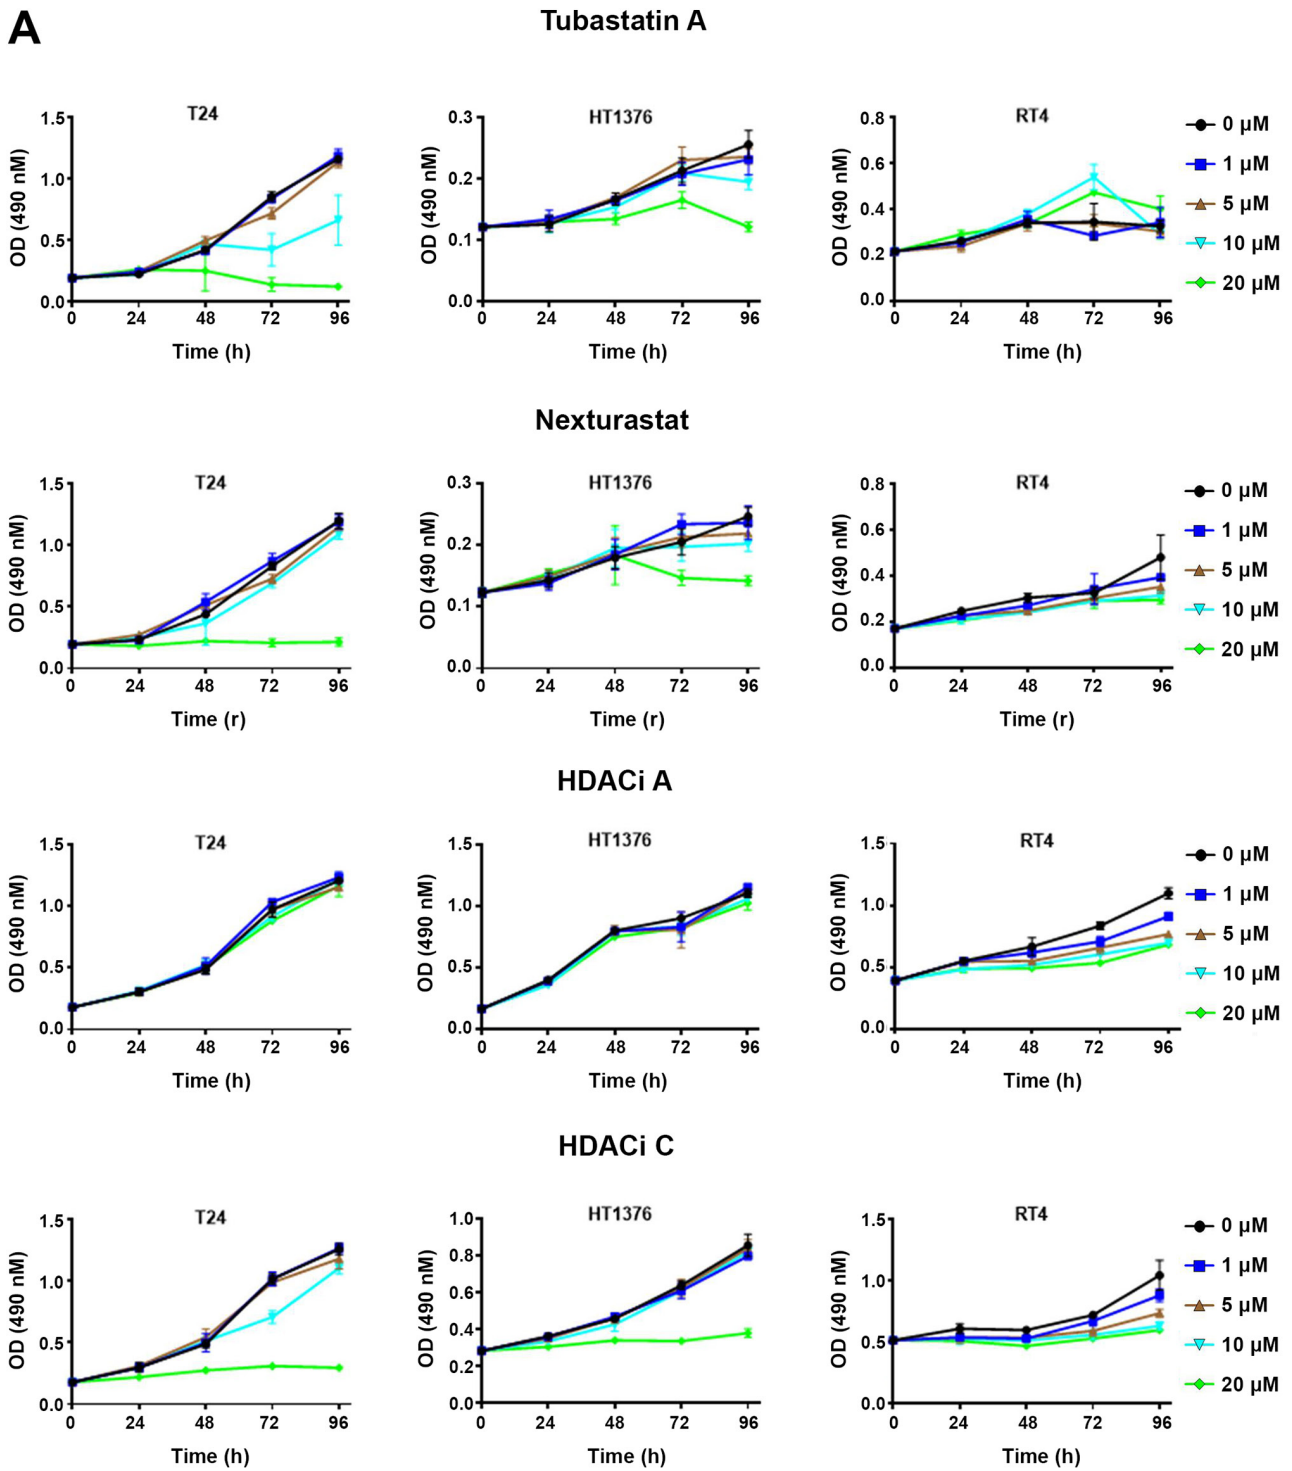

Figure S1. Continued. Cultured urothelial cancer cell lines were treated with DMSO or indicated doses of HDAC6 small molecule inhibitors for 24, 48, 72 and 96 h. (A) Tubastatin A, nexturastat, HDACi A and HDACi C. (B) HDACi G, H, I and J. Relative cell viability was measured using an MTS assay and results are presented as OD 490 nm. OD, optical density; HDACi, histone deacetylase inhibitor.

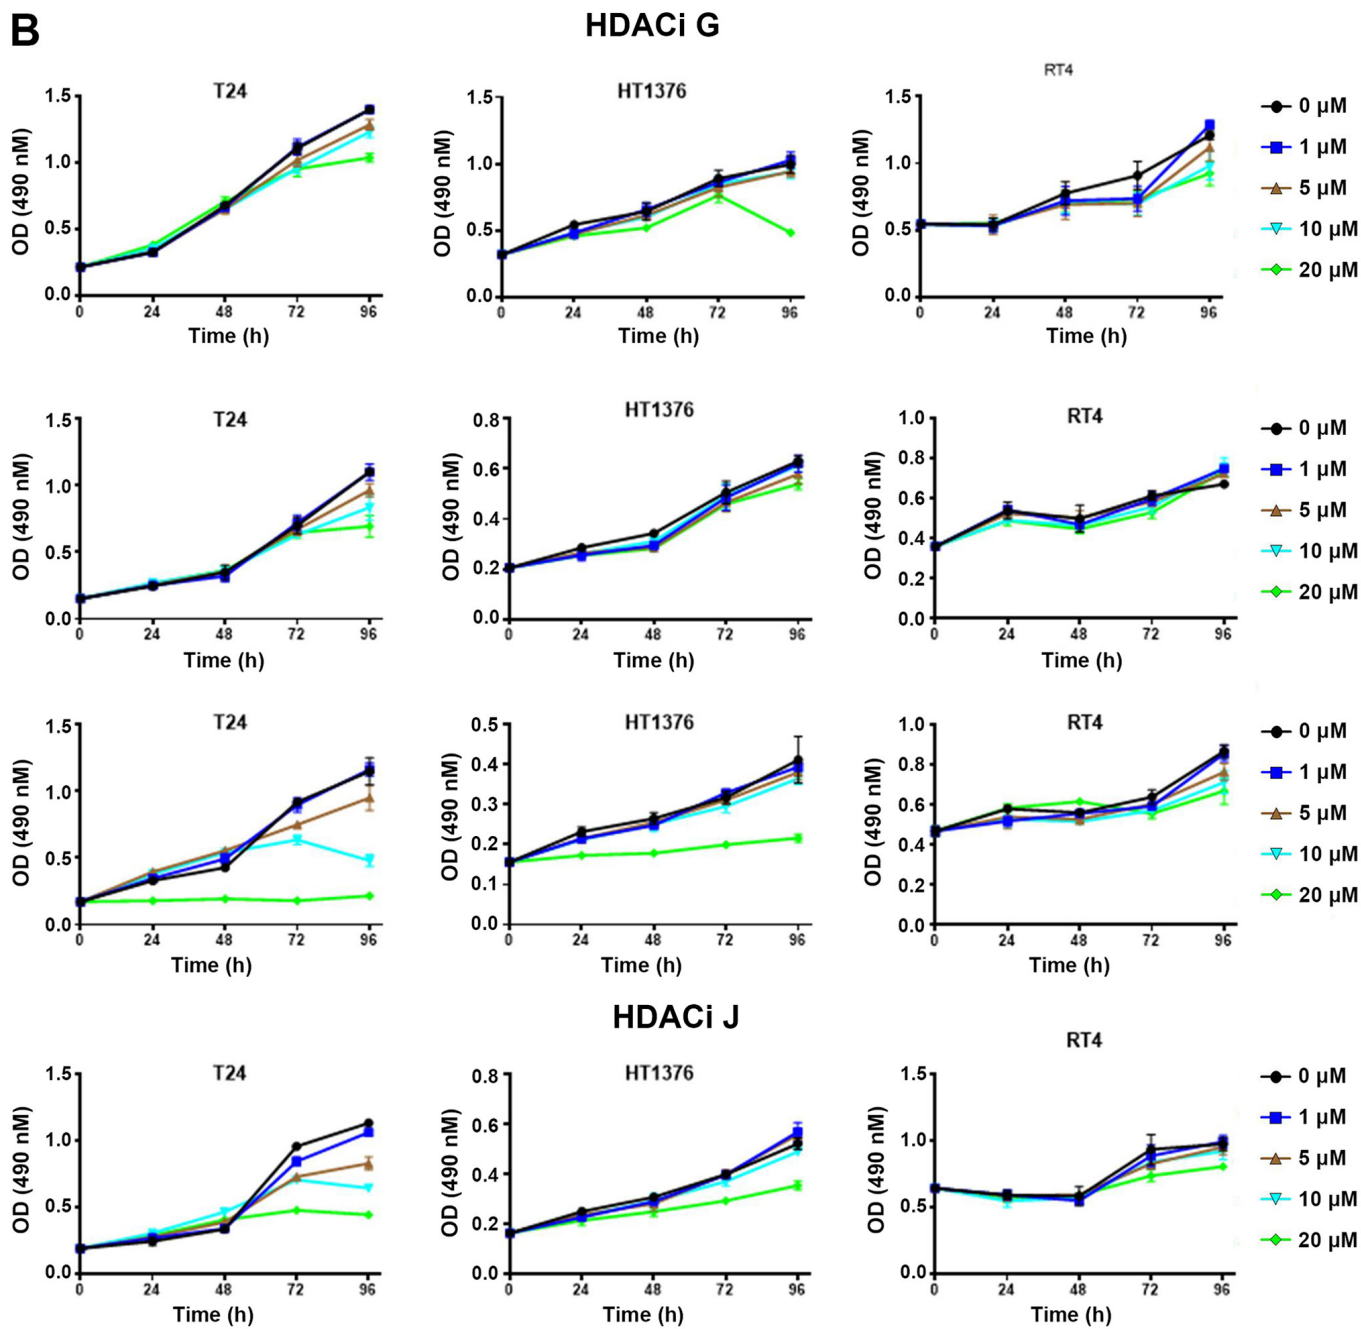

Supplement: Supplementary_Data.pdf [file Supplementary_Data.pdf]
